# Supplementary material for: Toenail Selenium and Incidence of Type 2 Diabetes in U.S. Men and Women
Source: Oxford University Press journal article supplement (doi:10.2337/dc11-2136), 2012-05-24
Supplement: dc112136supplementarydata.pdf [file dc112136supplementarydata.pdf]

# SUPPLEMENTARY DATA

**Supplementary Table 1.** Baseline characteristics of participants according to toenail selenium level

|                                                                  | Sex-specific quintiles of toenail selenium |        |                                                   |        |                                                    |        |                                                    |        |                                 |        |
|------------------------------------------------------------------|--------------------------------------------|--------|---------------------------------------------------|--------|----------------------------------------------------|--------|----------------------------------------------------|--------|---------------------------------|--------|
|                                                                  | 1st quintile                               |        | 2nd quintile                                      |        | 3rd quintile                                       |        | 4th quintile                                       |        | 5th quintile                    |        |
|                                                                  | Male: <0.719<br>Female:<0.665              |        | Male: 0.719-<br><0.788<br>Female:0.665-<br><0.726 |        | Male: 0.788 -<br><0.858<br>Female:0.726-<br><0.784 |        | Male: 0.858 -<br><0.950<br>Female:0.784-<br><0.859 |        | Male: 0.950 ≤<br>Female:0.859 ≤ |        |
|                                                                  | Mean<br>or %                               | (SD)   | Mean<br>or %                                      | (SD)   | Mean<br>or %                                       | (SD)   | Mean<br>or %                                       | (SD)   | Mean<br>or %                    | (SD)   |
| <b>HPFS (N)</b>                                                  | 699                                        |        | 700                                               |        | 726                                                |        | 706                                                |        | 704                             |        |
| <b>Toenail selenium (µg/g)</b>                                   | 0.66                                       | (0.05) | 0.76                                              | (0.02) | 0.82                                               | (0.02) | 0.90                                               | (0.03) | 1.07                            | (0.12) |
| <b>Age (years)</b>                                               | 60.0                                       | (8.9)  | 59.2                                              | (8.6)  | 59.7                                               | (8.9)  | 59.2                                               | (8.6)  | 59.8                            | (8.6)  |
| <b>Dietary Intake</b>                                            |                                            |        |                                                   |        |                                                    |        |                                                    |        |                                 |        |
| Total energy (kcal/day)                                          | 2042.6                                     | (639)  | 2032.4                                            | (617)  | 2013.3                                             | (611)  | 2039.9                                             | (640)  | 2020.0                          | (630)  |
| Saturated fat intake (g/day)                                     | 26.2                                       | (6.0)  | 25.3                                              | (6.4)  | 24.7                                               | (6.1)  | 24.6                                               | (6.2)  | 24.1                            | (6.4)  |
| Polyunsaturated fat intake (g/day)                               | 12.9                                       | (3.5)  | 12.8                                              | (3.4)  | 12.9                                               | (3.2)  | 13.1                                               | (3.5)  | 13.3                            | (3.8)  |
| Trans fat intake (g/day)                                         | 2.9                                        | (1.1)  | 3.0                                               | (1.1)  | 2.9                                                | (1.1)  | 2.9                                                | (1.1)  | 2.9                             | (1.1)  |
| Whole grain intake (g/day)                                       | 19.1                                       | (16.9) | 19.4                                              | (16.8) | 21.6                                               | (19.0) | 22.3                                               | (20.0) | 23.4                            | (20.1) |
| Coffee intake (serving/day)                                      | 1.0                                        | (1.3)  | 1.0                                               | (1.4)  | 0.9                                                | (1.2)  | 0.8                                                | (1.2)  | 0.9                             | (1.3)  |
| Alcohol intake (g/day)                                           | 15.0                                       | (20.0) | 12.9                                              | (15.8) | 12.0                                               | (15.2) | 11.2                                               | (14.7) | 10.4                            | (15.2) |
| <b>Selenium supplement use (yes, %)</b>                          | 4.3                                        |        | 4.3                                               |        | 5.4                                                |        | 5.7                                                |        | 10.7                            |        |
| <b>Multivitamin supplement use <sup>a</sup><br/>(pills/week)</b> |                                            |        |                                                   |        |                                                    |        |                                                    |        |                                 |        |
| None                                                             | 57.5                                       |        | 57.6                                              |        | 56.9                                               |        | 56.4                                               |        | 50.9                            |        |
| 1 ~ 5                                                            | 9.6                                        |        | 10.4                                              |        | 9.8                                                |        | 9.9                                                |        | 9.9                             |        |
| 6 ~ 9                                                            | 21.0                                       |        | 19.3                                              |        | 19.8                                               |        | 19.6                                               |        | 21.5                            |        |
| 10 or more                                                       | 3.0                                        |        | 4.0                                               |        | 5.8                                                |        | 3.8                                                |        | 6.1                             |        |
| <b>Geographic region <sup>b</sup></b>                            |                                            |        |                                                   |        |                                                    |        |                                                    |        |                                 |        |
| West                                                             | 12.0                                       |        | 15.6                                              |        | 23.0                                               |        | 23.9                                               |        | 31.1                            |        |
| Midwest/north                                                    | 8.7                                        |        | 12.9                                              |        | 16.3                                               |        | 19.8                                               |        | 21.5                            |        |
| South                                                            | 20.3                                       |        | 18.9                                              |        | 16.1                                               |        | 15.9                                               |        | 15.2                            |        |

# SUPPLEMENTARY DATA

|                                                                 |        |        |        |        |        |        |        |        |        |        |
|-----------------------------------------------------------------|--------|--------|--------|--------|--------|--------|--------|--------|--------|--------|
| Midwest/south                                                   | 29.8   |        | 23.4   |        | 19.7   |        | 20.1   |        | 14.4   |        |
| Northeast and other                                             | 29.2   |        | 29.3   |        | 24.9   |        | 20.3   |        | 17.9   |        |
| <b>Smoking status</b>                                           |        |        |        |        |        |        |        |        |        |        |
| Never                                                           | 33.8   |        | 35.6   |        | 42.2   |        | 44.6   |        | 43.2   |        |
| Former                                                          | 40.3   |        | 48.0   |        | 45.3   |        | 45.2   |        | 47.3   |        |
| Current (1-14/d)                                                | 4.2    |        | 2.7    |        | 3.4    |        | 2.8    |        | 2.0    |        |
| Current (15-34/d)                                               | 13.2   |        | 8.0    |        | 4.0    |        | 2.8    |        | 2.8    |        |
| Current (35+/d)                                                 | 5.7    |        | 2.1    |        | 0.7    |        | 0.9    |        | 1.6    |        |
| <b>Physical activity<sup>c</sup></b>                            | 2.9    | (1.4)  | 3.0    | (1.4)  | 3.0    | (1.4)  | 3.0    | (1.4)  | 3.0    | (1.4)  |
| <b>BMI (kg/m<sup>2</sup>)<sup>a</sup></b>                       |        |        |        |        |        |        |        |        |        |        |
| <22                                                             | 10.4   |        | 6.4    |        | 10.9   |        | 11.2   |        | 11.5   |        |
| 22 -<24                                                         | 20.3   |        | 22.9   |        | 21.6   |        | 20.8   |        | 23.3   |        |
| 24 -<27                                                         | 42.2   |        | 43.7   |        | 39.9   |        | 39.1   |        | 38.9   |        |
| 27 -<30                                                         | 20.7   |        | 18.1   |        | 19.3   |        | 21.1   |        | 17.9   |        |
| >=30                                                            | 6.3    |        | 8.9    |        | 8.3    |        | 7.8    |        | 8.4    |        |
|                                                                 |        |        |        |        |        |        |        |        |        |        |
| <b>NHS (N)</b>                                                  | 730    |        | 727    |        | 729    |        | 714    |        | 730    |        |
| <b>Toenail selenium (µg/g)</b>                                  | 0.62   | (0.04) | 0.70   | (0.02) | 0.75   | (0.02) | 0.82   | (0.02) | 0.96   | (0.10) |
| <b>Age (years)</b>                                              | 52.8   | (5.9)  | 52.7   | (6.7)  | 52.8   | (6.1)  | 52.3   | (6.3)  | 52.4   | (6.8)  |
| <b>Dietary Intake</b>                                           |        |        |        |        |        |        |        |        |        |        |
| Total energy (kcal/day)                                         | 1722.0 | (525)  | 1754.7 | (538)  | 1749.5 | (528)  | 1744.5 | (515)  | 1745.1 | (525)  |
| Saturated fat intake (g/day)                                    | 22.4   | (5.0)  | 21.9   | (4.8)  | 21.7   | (4.7)  | 21.8   | (4.8)  | 21.2   | (4.6)  |
| Polyunsaturated fat intake (g/day)                              | 11.4   | (3.1)  | 11.5   | (3.1)  | 11.7   | (3.2)  | 11.6   | (3.3)  | 11.6   | (3.0)  |
| Trans fat intake (g/day)                                        | 3.3    | (1.1)  | 3.3    | (1.0)  | 3.4    | (1.1)  | 3.4    | (1.1)  | 3.3    | (1.1)  |
| Whole grain intake (g/day)                                      | 12.8   | (12.2) | 14.7   | (14.7) | 14.2   | (12.6) | 15.2   | (13.5) | 14.8   | (12.6) |
| Coffee intake (serving/day)                                     | 2.4    | (1.8)  | 2.1    | (1.7)  | 2.0    | (1.6)  | 1.8    | (1.6)  | 1.8    | (1.5)  |
| Alcohol intake (g/day)                                          | 9.2    | (14.6) | 8.5    | (13.7) | 7.1    | (11.2) | 6.7    | (11.9) | 6.4    | (11.3) |
| <b>Selenium supplement use (yes, %)</b>                         | 1.6    |        | 1.7    |        | 1.5    |        | 2.9    |        | 6.2    |        |
| <b>Multivitamin supplement use<sup>a</sup><br/>(pills/week)</b> |        |        |        |        |        |        |        |        |        |        |

# SUPPLEMENTARY DATA

|                                            |      |       |      |       |      |       |      |       |      |       |
|--------------------------------------------|------|-------|------|-------|------|-------|------|-------|------|-------|
| None                                       | 58.6 |       | 57.6 |       | 60.2 |       | 59.4 |       | 54.8 |       |
| 1 ~ 5                                      | 12.3 |       | 13.5 |       | 14.4 |       | 11.5 |       | 10.8 |       |
| 6 ~ 9                                      | 23.0 |       | 20.1 |       | 18.4 |       | 21.2 |       | 22.5 |       |
| 10 or more                                 | 2.3  |       | 3.6  |       | 3.6  |       | 3.8  |       | 6.4  |       |
| <b>Geographic region <sup>b</sup></b>      |      |       |      |       |      |       | 4.2  |       | 5.5  |       |
| West                                       | 8.5  |       | 12.2 |       | 13.4 |       | 14.9 |       | 20.6 |       |
| Midwest/north                              | 6.4  |       | 6.3  |       | 8.8  |       | 8.3  |       | 7.8  |       |
| South                                      | 5.2  |       | 7.6  |       | 6.7  |       | 9.1  |       | 8.8  |       |
| Midwest/south                              | 15.6 |       | 11.4 |       | 10.4 |       | 10.1 |       | 7.0  |       |
| Northeast and other                        | 64.3 |       | 62.5 |       | 60.6 |       | 57.7 |       | 55.9 |       |
| <b>Smoking status</b>                      |      |       |      |       |      |       |      |       |      |       |
| Never                                      | 21.5 |       | 30.4 |       | 36.2 |       | 41.2 |       | 44.4 |       |
| Former                                     | 16.0 |       | 23.1 |       | 26.5 |       | 30.3 |       | 33.2 |       |
| Current (1-14/d)                           | 14.3 |       | 11.6 |       | 12.9 |       | 8.8  |       | 9.3  |       |
| Current (15-34/d)                          | 39.6 |       | 30.0 |       | 20.4 |       | 17.1 |       | 11.4 |       |
| Current (35+/d)                            | 8.6  |       | 5.0  |       | 3.8  |       | 2.7  |       | 1.6  |       |
| <b>Physical activity <sup>c</sup></b>      | 2.8  | (1.4) | 3.0  | (1.4) | 2.9  | (1.4) | 3.1  | (1.4) | 2.9  | (1.4) |
| <b>BMI (kg/m<sup>2</sup>) <sup>a</sup></b> |      |       |      |       |      |       |      |       |      |       |
| <22                                        | 32.2 |       | 28.3 |       | 24.7 |       | 27.3 |       | 24.2 |       |
| 22 -<24                                    | 22.4 |       | 22.7 |       | 20.0 |       | 16.1 |       | 18.1 |       |
| 24 -<27                                    | 22.3 |       | 23.5 |       | 27.2 |       | 25.7 |       | 25.5 |       |
| 27 -<30                                    | 11.5 |       | 13.6 |       | 15.4 |       | 14.1 |       | 14.5 |       |
| >=30                                       | 11.6 |       | 12.0 |       | 12.8 |       | 16.8 |       | 17.7 |       |

a. There are missing data, so the total n's are not identical.

b. West: AZ, CA, CO, ID, MT, NM, NV, OR, UT, WA, WY, and HI

Midwest/north: IA, KS, MI, ND, NE, SD, WI, and MN

South: AL, FL, LA, MS, TN, TX, AR, GA, and OK

Midwest/south IL, IN, KY, MO, VA, SC, NC, OH, and WV

Northeast and other : DE, MD, NJ, DC, AK, CT, GU, MA, ME, MI, NH, NY, PA, PR, PI, VI, and VT

c. Physical activity levels were measured in different ways in the Nurse's Health Study (NHS) and the Health Professionals Follow-Up Study (HPFS). In the HPFS, metabolic equivalents (METs) per week were calculated. In the NHS, the average recreational physical activity levels were calculated using the criteria of Hu et al. (29) based on information from the 1980 and 1982 questionnaires. Reported values are the means of physical activity level quintiles in each study.
